# Supplementary material for: Developing principles for predicting ionic liquid effects on reaction outcome. A demonstration using a simple condensation reaction
Source: Royal Society of Chemistry journal article supplement (doi:10.1039/c4ob01070a), 2014-01-01
Supplement: c4ob01070a1.pdf [file c4ob01070a1.pdf]

## Supporting Information:

Developing principles for predicting ionic liquid effects on reaction outcome. A demonstration using a simple condensation reaction

*Sinead T. Keaveney, Karin S. Schaffarczyk McHale, Ronald S. Haines and Jason B. Harper*

## Table of Contents

|                                                                                                                               |           |
|-------------------------------------------------------------------------------------------------------------------------------|-----------|
| <b>Representative plots for the determination of rate constants .....</b>                                                     | <b>2</b>  |
| <b>Benzaldehyde 1a and hexan-1-amine 2 .....</b>                                                                              | <b>3</b>  |
| Mole fraction plot: [Bmim][N(CF <sub>3</sub> SO <sub>2</sub> ) <sub>2</sub> ] 4 in acetonitrile, at 8.1°C .....               | 3         |
| Mole fraction plot: [Bmpy][N(CF <sub>3</sub> SO <sub>2</sub> ) <sub>2</sub> ] 5 in acetonitrile, at 8.1°C .....               | 4         |
| Mole fraction plot: [Bm <sub>2</sub> im][N(CF <sub>3</sub> SO <sub>2</sub> ) <sub>2</sub> ] 6 in acetonitrile, at 8.1°C ..... | 5         |
| Mole fraction plot: [Bm <sub>4</sub> im][N(CF <sub>3</sub> SO <sub>2</sub> ) <sub>2</sub> ] 7 in acetonitrile, at 8.1°C ..... | 6         |
| Eyring Data: Acetonitrile .....                                                                                               | 7         |
| Eyring Data: [Bmim][N(CF <sub>3</sub> SO <sub>2</sub> ) <sub>2</sub> ] 4 in acetonitrile .....                                | 8         |
| Eyring Data: [Bmpy][N(CF <sub>3</sub> SO <sub>2</sub> ) <sub>2</sub> ] 5 in acetonitrile .....                                | 10        |
| Eyring Data: [Bm <sub>2</sub> im][N(CF <sub>3</sub> SO <sub>2</sub> ) <sub>2</sub> ] 6 in acetonitrile .....                  | 11        |
| Eyring Data: [TOA][N(CF <sub>3</sub> SO <sub>2</sub> ) <sub>2</sub> ] 8.....                                                  | 12        |
| Activation Parameter Summary:.....                                                                                            | 12        |
| <b>4-Methoxybenzaldehyde 1b and hexan-1-amine 2 .....</b>                                                                     | <b>13</b> |
| Eyring Data: Acetonitrile .....                                                                                               | 13        |
| Eyring Data: [Bmim][N(CF <sub>3</sub> SO <sub>2</sub> ) <sub>2</sub> ] 4.....                                                 | 13        |
| Eyring Data: [Bmpy][N(CF <sub>3</sub> SO <sub>2</sub> ) <sub>2</sub> ] 5.....                                                 | 14        |
| Eyring Data: [Bm <sub>2</sub> im][N(CF <sub>3</sub> SO <sub>2</sub> ) <sub>2</sub> ] 6.....                                   | 14        |
| Eyring Data: [Bm <sub>4</sub> im][N(CF <sub>3</sub> SO <sub>2</sub> ) <sub>2</sub> ] 7.....                                   | 15        |
| Eyring Data: [TOA][N(CF <sub>3</sub> SO <sub>2</sub> ) <sub>2</sub> ] 8.....                                                  | 15        |
| Activation Parameter Summary:.....                                                                                            | 16        |

## Representative plots for the determination of rate constants

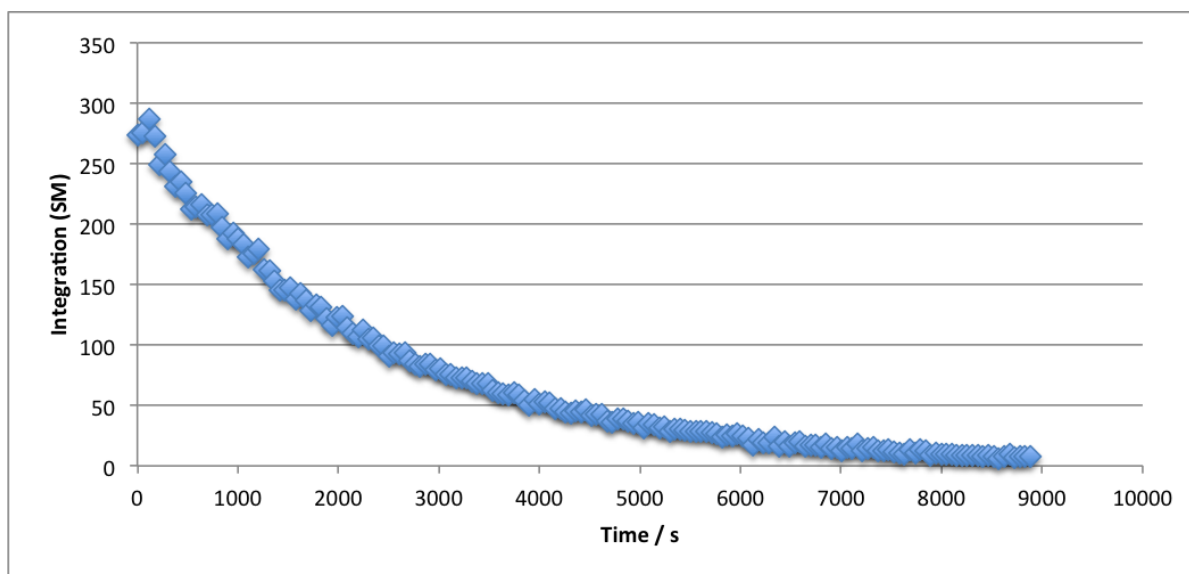

**Figure S1:** Plot of the integration of the signal due to the starting material **1a** in the  $^1\text{H}$  NMR spectrum vs time for the reaction of species **1a** and **2**, in a mixture of the ionic liquid **4** in acetonitrile at a mole fraction of 0.16 at  $8.1^\circ\text{C}$ . Using exponential fitting in Graphpad Prism the  $R^2$  value is 0.998 and the rate constant determined was  $(4.17 \pm 0.04) \times 10^{-4} \text{ s}^{-1}$ .

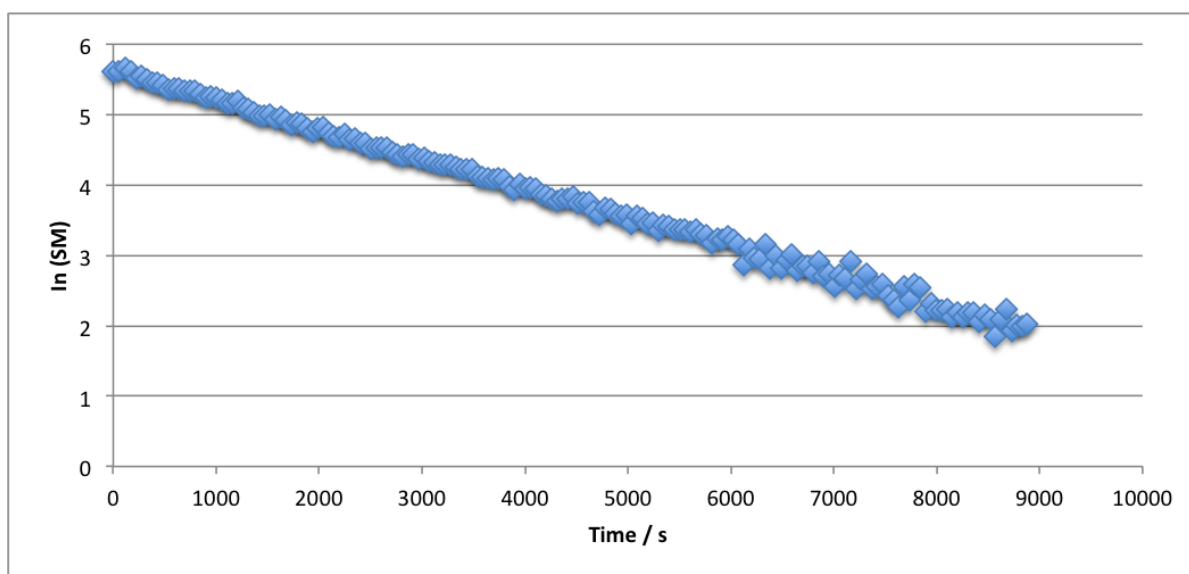

**Figure S2:** Plot of the natural logarithm of the integration of the signal due to the starting material **1a** in the  $^1\text{H}$  NMR spectrum vs time, for the case shown in Figure S1 above (the reaction of species **1a** and **2** in a mixture of the ionic liquid **4** in acetonitrile at a mole fraction of 0.16 at  $8.1^\circ\text{C}$ ). Using the LINEST function in Excel, the  $R^2$  value is 0.995 and the rate constant determined was  $(4.13 \pm 0.02) \times 10^{-4} \text{ s}^{-1}$ .

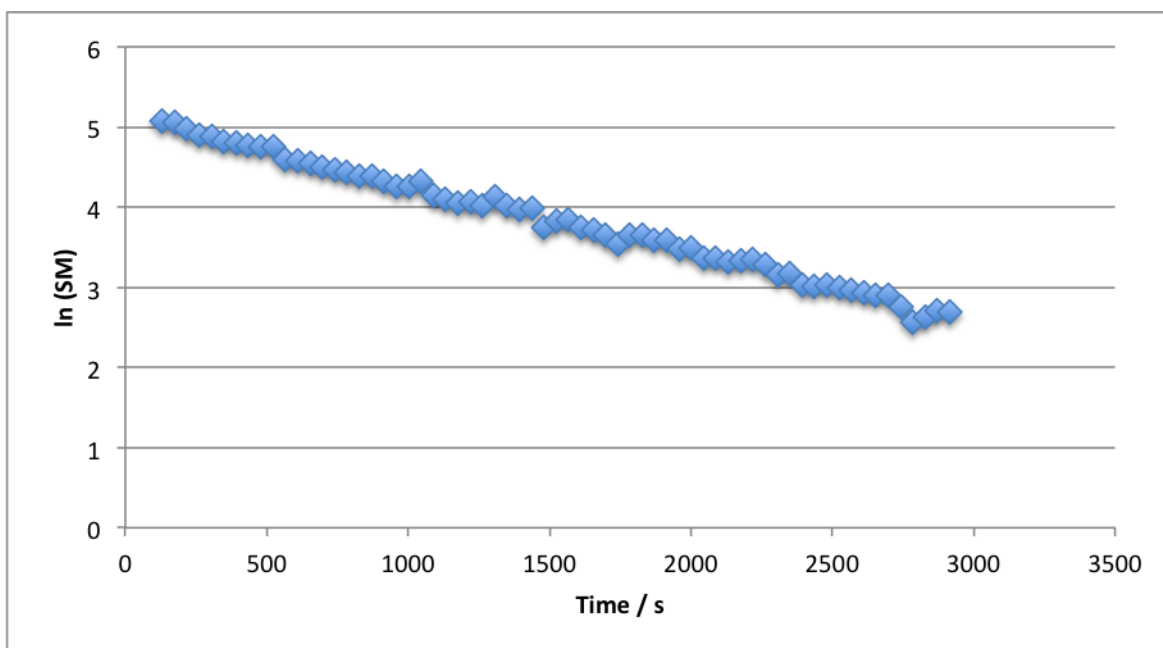

**Figure S3:** Plot of the integration of the signal due to the starting material **1a** in the  $^1\text{H}$  NMR spectrum vs time for the reaction of species **1a** and **2**, in a mixture of the ionic liquid **4** in acetonitrile at a mole fraction of 0.90 at  $8.1^\circ\text{C}$  Using the LINEST function in Excel, the  $R^2$  value is 0.994 and the rate constant determined was  $(8.49 \pm 0.08) \times 10^{-4} \text{ s}^{-1}$ .

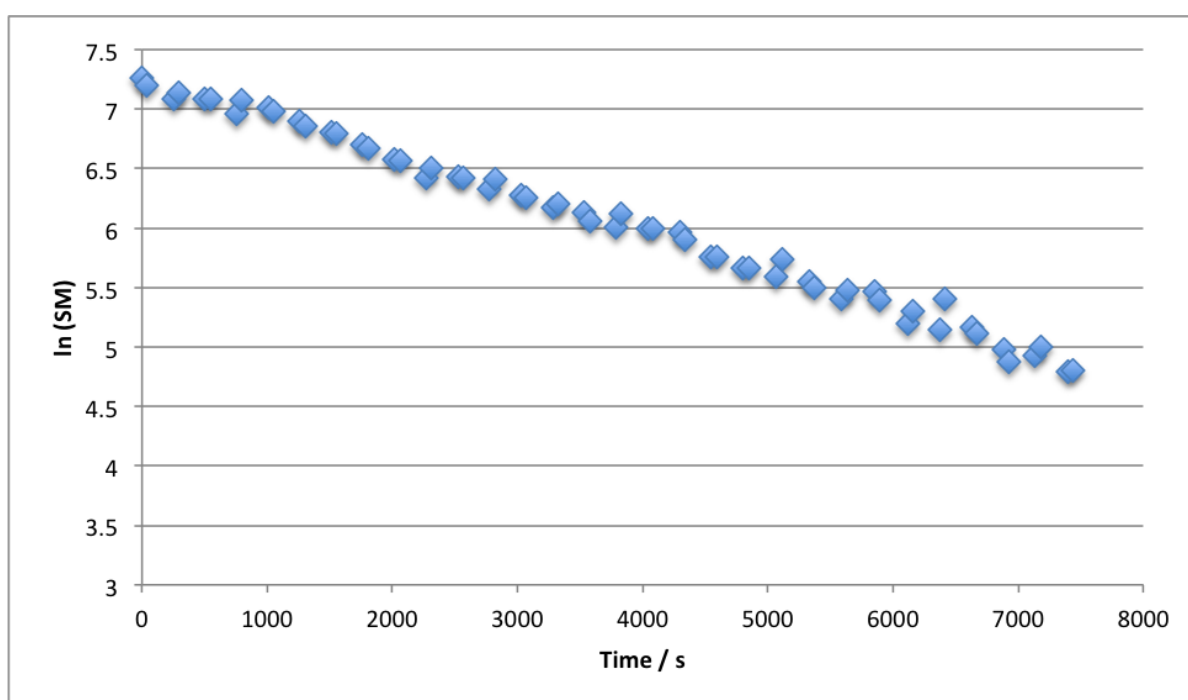

**Figure S4:** Plot of the integration of the signal due to the starting material **1b** in the  $^1\text{H}$  NMR spectrum vs time for the reaction of species **1b** and **2**, in a mixture of the ionic liquid **8** at a mole fraction of 0.87 (diluted only by reagents) at  $36.6^\circ\text{C}$  Using the LINEST function in Excel, the  $R^2$  value is 0.993 and the rate constant determined was  $(3.23 \pm 0.04) \times 10^{-4} \text{ s}^{-1}$ .

## Benzaldehyde **1a** and hexan-1-amine **2**

Mole fraction plot: [Bmim][N(CF<sub>3</sub>SO<sub>2</sub>)<sub>2</sub>] **4** in acetonitrile, at 8.1°C

| Mole Fraction<br>of <b>4</b> | [Nu] / mol L <sup>-1</sup> | $k_{\text{obs}} / 10^{-3} \text{ s}^{-1}$ | $k_2 / 10^{-3} \text{ L mol}^{-1} \text{ s}^{-1}$ | Average $k_2$<br>/ $10^{-3} \text{ L mol}^{-1} \text{ s}^{-1}$ |
|------------------------------|----------------------------|-------------------------------------------|---------------------------------------------------|----------------------------------------------------------------|
| 0.00                         | 0.144                      | 0.099                                     | 0.69                                              | 0.75 (0.06)                                                    |
|                              |                            | 0.115                                     | 0.80                                              |                                                                |
|                              |                            | 0.110                                     | 0.76                                              |                                                                |
| 0.01                         | 0.151                      | 0.187                                     | 1.24                                              | 1.17 (0.08)                                                    |
|                              |                            | 0.178                                     | 1.18                                              |                                                                |
|                              |                            | 0.162                                     | 1.07                                              |                                                                |
| 0.05                         | 0.156                      | 0.349                                     | 2.23                                              | 2.22 (0.08)                                                    |
|                              |                            | 0.360                                     | 2.30                                              |                                                                |
|                              |                            | 0.335                                     | 2.14                                              |                                                                |
| 0.16                         | 0.131                      | 0.435                                     | 3.31                                              | 3.18 (0.11)                                                    |
|                              |                            | 0.408                                     | 3.10                                              |                                                                |
|                              |                            | 0.413                                     | 3.14                                              |                                                                |
| 0.25                         | 0.129                      | 0.586                                     | 4.56                                              | 4.48 (0.31)                                                    |
|                              |                            | 0.610                                     | 4.75                                              |                                                                |
|                              |                            | 0.533                                     | 4.15                                              |                                                                |
| 0.39                         | 0.129                      | 0.679                                     | 5.28                                              | 5.40 (0.11)                                                    |
|                              |                            | 0.708                                     | 5.50                                              |                                                                |
|                              |                            | 0.697                                     | 5.42                                              |                                                                |
| 0.49                         | 0.151                      | 0.706                                     | 4.67                                              | 4.79 (0.10)                                                    |
|                              |                            | 0.734                                     | 4.85                                              |                                                                |
|                              |                            | 0.732                                     | 4.84                                              |                                                                |
| 0.51                         | 0.134                      | 0.589                                     | 4.40                                              | 4.42 (0.25)                                                    |
|                              |                            | 0.626                                     | 4.68                                              |                                                                |
|                              |                            | 0.559                                     | 4.18                                              |                                                                |
| 0.65                         | 0.126                      | 0.770                                     | 6.10                                              | 6.01 (0.15)                                                    |
|                              |                            | 0.737                                     | 5.84                                              |                                                                |
|                              |                            | 0.769                                     | 6.09                                              |                                                                |
| 0.80                         | 0.143                      | 0.858                                     | 6.01                                              | 6.02 (0.23)                                                    |
|                              |                            | 0.893                                     | 6.25                                              |                                                                |
|                              |                            | 0.828                                     | 5.80                                              |                                                                |
| 0.91                         | 0.131                      | 0.903                                     | 6.90                                              | 6.72 (0.21)                                                    |
|                              |                            | 0.849                                     | 6.48                                              |                                                                |
|                              |                            | 0.888                                     | 6.78                                              |                                                                |
| 0.97                         | 0.099                      | 0.694                                     | 7.02                                              | 6.80 (0.20)                                                    |
|                              |                            | 0.657                                     | 6.64                                              |                                                                |
|                              |                            | 0.667                                     | 6.74                                              |                                                                |

Mole fraction plot: [Bmpy][N(CF<sub>3</sub>SO<sub>2</sub>)<sub>2</sub>] 5 in acetonitrile, at 8.1°C

| Mole Fraction of 5 | [Nu] / mol L <sup>-1</sup> | $k_{\text{obs}} / 10^{-3} \text{ s}^{-1}$ | $k_2 / 10^{-3} \text{ L mol}^{-1} \text{ s}^{-1}$ | Average $k_2 / 10^{-3} \text{ L mol}^{-1} \text{ s}^{-1}$ |
|--------------------|----------------------------|-------------------------------------------|---------------------------------------------------|-----------------------------------------------------------|
| 0.00               | 0.144                      | 0.099                                     | 0.69                                              | 0.75 (0.06)                                               |
|                    |                            | 0.115                                     | 0.80                                              |                                                           |
|                    |                            | 0.110                                     | 0.76                                              |                                                           |
| 0.06               | 0.148                      | 0.343                                     | 2.32                                              | 2.35 (0.04)                                               |
|                    |                            | 0.354                                     | 2.39                                              |                                                           |
|                    |                            | 0.346                                     | 2.33                                              |                                                           |
| 0.13               | 0.152                      | 0.635                                     | 4.18                                              | 4.19 (0.04)                                               |
|                    |                            | 0.629                                     | 4.15                                              |                                                           |
|                    |                            | 0.642                                     | 4.23                                              |                                                           |
| 0.24               | 0.164                      | 0.974                                     | 5.93                                              | 6.16 (0.24)                                               |
|                    |                            | 0.991                                     | 6.03                                              |                                                           |
|                    |                            | 1.024                                     | 6.23                                              |                                                           |
|                    |                            | 1.062                                     | 6.46                                              |                                                           |
| 0.28               | 0.276                      | 1.343                                     | 4.86                                              | 4.88 (0.02)                                               |
|                    |                            | 1.349                                     | 4.88                                              |                                                           |
|                    |                            | 1.355                                     | 4.91                                              |                                                           |
| 0.41               | 0.209                      | 1.528                                     | 7.33                                              | 7.15 (0.29)                                               |
|                    |                            | 1.421                                     | 6.81                                              |                                                           |
|                    |                            | 1.525                                     | 7.31                                              |                                                           |
| 0.51               | 0.203                      | 1.764                                     | 8.71                                              | 8.72 (0.09)                                               |
|                    |                            | 1.749                                     | 8.63                                              |                                                           |
|                    |                            | 1.785                                     | 8.81                                              |                                                           |
| 0.61               | 0.215                      | 2.448                                     | 11.39                                             | 12.34 (1.00)                                              |
|                    | 0.200                      | 2.452                                     | 12.26                                             |                                                           |
|                    |                            | 2.677                                     | 13.38                                             |                                                           |
| 0.71               | 0.177                      | 2.122                                     | 12.00                                             | 12.02 (0.38)                                              |
|                    |                            | 2.196                                     | 12.41                                             |                                                           |
|                    |                            | 2.060                                     | 11.64                                             |                                                           |
| 0.79               | 0.203                      | 2.726                                     | 13.46                                             | 14.18 (0.81)                                              |
|                    |                            | 3.051                                     | 15.06                                             |                                                           |
|                    |                            | 2.843                                     | 14.03                                             |                                                           |
| 0.86               | 0.215                      | 2.842                                     | 13.19                                             | 13.28 (0.28)                                              |
|                    |                            | 2.813                                     | 13.06                                             |                                                           |
|                    |                            | 2.928                                     | 13.59                                             |                                                           |
| 0.91               | 0.178                      | 3.137                                     | 17.59                                             | 17.33 (0.56)                                              |
|                    |                            | 2.976                                     | 16.69                                             |                                                           |
|                    |                            | 3.159                                     | 17.71                                             |                                                           |
| 0.94               | 0.189                      | 4.168                                     | 22.00                                             | 21.33 (0.65)                                              |
|                    |                            | 4.029                                     | 21.27                                             |                                                           |
|                    |                            | 3.924                                     | 20.71                                             |                                                           |

Mole fraction plot: [Bm<sub>2</sub>im][N(CF<sub>3</sub>SO<sub>2</sub>)<sub>2</sub>] **6** in acetonitrile, at 8.1°C

| Mole Fraction<br>of <b>6</b> | [Nu] / mol L <sup>-1</sup> | $k_{\text{obs}} / 10^{-3} \text{ s}^{-1}$ | $k_2 / 10^{-3} \text{ L mol}^{-1} \text{ s}^{-1}$ | Average $k_2$<br>/ $10^{-3} \text{ L mol}^{-1} \text{ s}^{-1}$ |
|------------------------------|----------------------------|-------------------------------------------|---------------------------------------------------|----------------------------------------------------------------|
| 0.00                         | 0.144                      | 0.099                                     | 0.69                                              | 0.75 (0.06)                                                    |
|                              |                            | 0.115                                     | 0.80                                              |                                                                |
|                              |                            | 0.110                                     | 0.76                                              |                                                                |
| 0.10                         | 0.160                      | 0.410                                     | 2.57                                              | 2.55 (0.04)                                                    |
|                              |                            | 0.399                                     | 2.50                                              |                                                                |
|                              |                            | 0.411                                     | 2.58                                              |                                                                |
| 0.20                         | 0.112                      | 0.378                                     | 3.38                                              | 3.34 (0.07)                                                    |
|                              |                            | 0.378                                     | 3.37                                              |                                                                |
|                              |                            | 0.365                                     | 3.26                                              |                                                                |
| 0.30                         | 0.136                      | 0.655                                     | 4.82                                              | 4.65 (0.15)                                                    |
|                              |                            | 0.621                                     | 4.57                                              |                                                                |
|                              |                            | 0.618                                     | 4.55                                              |                                                                |
| 0.39                         | 0.151                      | 0.779                                     | 5.15                                              | 5.16 (0.03)                                                    |
|                              |                            | 0.786                                     | 5.20                                              |                                                                |
|                              |                            | 0.776                                     | 5.14                                              |                                                                |
| 0.49                         | 0.167                      | 0.740                                     | 4.43                                              | 4.49 (0.05)                                                    |
|                              |                            | 0.758                                     | 4.54                                              |                                                                |
|                              |                            | 0.749                                     | 4.49                                              |                                                                |
| 0.60                         | 0.138                      | 0.782                                     | 5.65                                              | 5.68 (0.09)                                                    |
|                              |                            | 0.775                                     | 5.60                                              |                                                                |
|                              |                            | 0.800                                     | 5.78                                              |                                                                |
| 0.67                         | 0.159                      | 0.968                                     | 6.08                                              | 6.04 (0.04)                                                    |
|                              |                            | 0.955                                     | 6.00                                              |                                                                |
|                              |                            | 0.959                                     | 6.03                                              |                                                                |
| 0.86                         | 0.166                      | 1.052                                     | 6.33                                              | 6.31 (0.03)                                                    |
|                              |                            | 1.045                                     | 6.29                                              |                                                                |
| 0.95                         | 0.157                      | 1.062                                     | 6.76                                              | 6.89 (0.34)                                                    |
|                              |                            | 1.145                                     | 7.28                                              |                                                                |
|                              |                            | 1.045                                     | 6.64                                              |                                                                |

Mole fraction plot: [Bm<sub>4</sub>im][N(CF<sub>3</sub>SO<sub>2</sub>)<sub>2</sub>] 7 in acetonitrile, at 8.1°C

| <b>Mole Fraction<br/>of 7</b> | <b>[Nu] / mol L<sup>-1</sup></b> | <b><i>k</i><sub>obs</sub> / 10<sup>-3</sup> s<sup>-1</sup></b> | <b><i>k</i><sub>2</sub> / 10<sup>-3</sup> L mol<sup>-1</sup> s<sup>-1</sup></b> | <b>Average <i>k</i><sub>2</sub><br/>/ 10<sup>-3</sup> L mol<sup>-1</sup> s<sup>-1</sup></b> |
|-------------------------------|----------------------------------|----------------------------------------------------------------|---------------------------------------------------------------------------------|---------------------------------------------------------------------------------------------|
| 0.00                          | 0.144                            | 0.099                                                          | 0.69                                                                            | 0.75 (0.06)                                                                                 |
|                               |                                  | 0.115                                                          | 0.80                                                                            |                                                                                             |
|                               |                                  | 0.110                                                          | 0.76                                                                            |                                                                                             |
| 0.05                          | 0.150                            | 0.696                                                          | 4.64                                                                            | 4.60 (0.05)                                                                                 |
|                               |                                  | 0.696                                                          | 4.64                                                                            |                                                                                             |
|                               |                                  | 0.682                                                          | 4.54                                                                            |                                                                                             |
| 0.12                          | 0.150                            | 1.383                                                          | 9.21                                                                            | 9.47 (0.24)                                                                                 |
|                               |                                  | 1.452                                                          | 9.67                                                                            |                                                                                             |
|                               |                                  | 1.433                                                          | 9.54                                                                            |                                                                                             |

## Eyring Data: Acetonitrile

| Temperature / °C | [Nu] / mol L <sup>-1</sup> | $k_{\text{obs}}$<br>/ 10 <sup>-3</sup> s <sup>-1</sup> | $k_2$<br>/ 10 <sup>-3</sup> L mol <sup>-1</sup> s <sup>-1</sup> |
|------------------|----------------------------|--------------------------------------------------------|-----------------------------------------------------------------|
| 8.1              | 0.144                      | 0.099                                                  | 0.69                                                            |
|                  |                            | 0.095                                                  | 0.66                                                            |
|                  |                            | 0.110                                                  | 0.76                                                            |
| 21.2             | 0.144                      | 0.188                                                  | 1.31                                                            |
|                  |                            | 0.188                                                  | 1.35                                                            |
|                  |                            | 0.204                                                  | 1.46                                                            |
| 27.8             | 0.144                      | 0.240                                                  | 1.67                                                            |
|                  |                            | 0.245                                                  | 1.70                                                            |
|                  |                            | 0.264                                                  | 1.89                                                            |
| 15.4             | 0.144                      | 0.166                                                  | 1.19                                                            |
|                  |                            | 0.142                                                  | 1.01                                                            |
|                  |                            | 0.171                                                  | 1.22                                                            |



Eyring Data: [Bmim][N(CF<sub>3</sub>SO<sub>2</sub>)<sub>2</sub>] **4** in acetonitrile

| Mole Fraction<br>of <b>4</b> | Temperature /<br>°C | [Nu] / mol L <sup>-1</sup> | <i>k</i> <sub>obs</sub><br>/ 10 <sup>-3</sup> s <sup>-1</sup> | <i>k</i> <sub>2</sub><br>/ 10 <sup>-3</sup> L mol <sup>-1</sup> s <sup>-1</sup> |
|------------------------------|---------------------|----------------------------|---------------------------------------------------------------|---------------------------------------------------------------------------------|
| 0.23                         | 21.4                | 0.139                      | 1.028                                                         | 7.42                                                                            |
|                              |                     |                            | 1.021                                                         | 7.37                                                                            |
|                              |                     |                            | 1.033                                                         | 7.45                                                                            |
|                              |                     |                            | 1.032                                                         | 7.45                                                                            |
|                              | 15.4                |                            | 0.759                                                         | 5.48                                                                            |
|                              |                     |                            | 0.745                                                         | 5.37                                                                            |
|                              |                     |                            | 0.768                                                         | 5.54                                                                            |
|                              | 8.1                 |                            | 0.494                                                         | 3.56                                                                            |
|                              |                     |                            | 0.503                                                         | 3.63                                                                            |
|                              |                     |                            | 0.494                                                         | 3.56                                                                            |
|                              |                     |                            | 0.338                                                         | 2.44                                                                            |
|                              | 2.3                 |                            | 0.334                                                         | 2.41                                                                            |
|                              |                     |                            | 0.339                                                         | 2.44                                                                            |
|                              |                     |                            | 0.50                                                          | 21.1                                                                            |
| 1.631                        |                     | 11.03                      |                                                               |                                                                                 |
| 1.661                        |                     | 11.23                      |                                                               |                                                                                 |
| 1.655                        | 11.19               |                            |                                                               |                                                                                 |
| 15.3                         | 1.120               | 7.57                       |                                                               |                                                                                 |
|                              | 1.191               | 8.05                       |                                                               |                                                                                 |
|                              | 1.200               | 8.11                       |                                                               |                                                                                 |
| 8.1                          | 0.780               | 5.27                       |                                                               |                                                                                 |
|                              | 0.769               | 5.20                       |                                                               |                                                                                 |
|                              | 0.827               | 5.59                       |                                                               |                                                                                 |
|                              | 0.551               | 3.73                       |                                                               |                                                                                 |
| 1.7                          | 0.548               | 3.71                       |                                                               |                                                                                 |
|                              | 0.558               | 3.77                       |                                                               |                                                                                 |
|                              | 0.97                | 15.4                       | 1.011                                                         | 10.22                                                                           |
| 0.929                        |                     |                            | 9.39                                                          |                                                                                 |
| 0.987                        |                     |                            | 9.97                                                          |                                                                                 |
| 1.281                        |                     |                            | 12.94                                                         |                                                                                 |
| 21.4                         |                     | 1.311                      | 13.25                                                         |                                                                                 |
|                              |                     | 1.524                      | 15.40                                                         |                                                                                 |
|                              |                     | 0.694                      | 7.02                                                          |                                                                                 |
|                              |                     | 0.657                      | 6.64                                                          |                                                                                 |
| 8.1                          |                     | 0.667                      | 6.74                                                          |                                                                                 |
|                              |                     | 0.416                      | 4.20                                                          |                                                                                 |
|                              |                     | 0.432                      | 4.36                                                          |                                                                                 |
| 0                            |                     | 0.391                      | 3.95                                                          |                                                                                 |

Activation parameters: Benzaldehyde **1a** and hexan-1-amine **2** in [Bmim][N(CF<sub>3</sub>SO<sub>2</sub>)<sub>2</sub>] **4** / acetonitrile mixtures

| <b>Mole Fraction<br/>[Bmim][N(CF<sub>3</sub>SO<sub>2</sub>)<sub>2</sub>]<br/>4 in acetonitrile</b> | <b><math>\Delta H^\ddagger</math> / kJ mol<sup>-1</sup></b> | <b><math>\Delta S^\ddagger</math> / J K<sup>-1</sup> mol<sup>-1</sup></b> |
|----------------------------------------------------------------------------------------------------|-------------------------------------------------------------|---------------------------------------------------------------------------|
| 0                                                                                                  | 27.2 (2.5)                                                  | -272.1 (8.6)                                                              |
| 0.23                                                                                               | 34.5 (0.5)                                                  | -233.2 (1.7)                                                              |
| 0.50                                                                                               | 32.4 (0.8)                                                  | -237.0 (2.8)                                                              |
| 0.97                                                                                               | 32.4 (1.3)                                                  | -235.2 (4.6)                                                              |

Eyring Data: [Bmpy][N(CF<sub>3</sub>SO<sub>2</sub>)<sub>2</sub>] **5** in acetonitrile

| Mole Fraction of <b>5</b> | Temperature / °C | [Nu] / mol L <sup>-1</sup> | $k_{\text{obs}}$ / 10 <sup>-3</sup> s <sup>-1</sup> | $k_2$ / 10 <sup>-3</sup> L mol <sup>-1</sup> s <sup>-1</sup> |
|---------------------------|------------------|----------------------------|-----------------------------------------------------|--------------------------------------------------------------|
| 0.24                      | 8.1              | 0.164                      | 0.974                                               | 5.93                                                         |
|                           |                  |                            | 0.991                                               | 6.03                                                         |
|                           |                  |                            | 1.024                                               | 6.23                                                         |
|                           |                  |                            | 1.062                                               | 6.46                                                         |
|                           | 1.6              |                            | 0.660                                               | 4.02                                                         |
|                           |                  |                            | 0.670                                               | 4.08                                                         |
|                           |                  |                            | 0.662                                               | 4.03                                                         |
|                           |                  |                            | 0.405                                               | 2.47                                                         |
|                           | -5.2             |                            | 0.395                                               | 2.41                                                         |
|                           |                  |                            | 0.396                                               | 2.41                                                         |
|                           |                  |                            | 0.247                                               | 1.51                                                         |
|                           |                  |                            | 0.246                                               | 1.50                                                         |
|                           | -12.7            |                            | 0.246                                               | 1.50                                                         |
|                           |                  |                            | 8.1                                                 | 4.168                                                        |
| 4.029                     |                  | 21.27                      |                                                     |                                                              |
| 3.924                     |                  | 20.71                      |                                                     |                                                              |
| 2.4                       |                  | 2.110                      |                                                     | 11.14                                                        |
|                           |                  | 2.758                      |                                                     | 14.56                                                        |
|                           |                  | 2.328                      |                                                     | 12.29                                                        |
| -4.6                      |                  | 1.420                      | 7.50                                                |                                                              |
|                           |                  | 1.330                      | 7.02                                                |                                                              |
|                           |                  | 1.415                      | 7.47                                                |                                                              |
|                           | -12.6            | 0.729                      | 3.85                                                |                                                              |
| 0.736                     |                  | 3.88                       |                                                     |                                                              |
| 0.729                     |                  | 3.85                       |                                                     |                                                              |

Activation parameters: Benzaldehyde **1a** and hexan-1-amine **2** in [Bmpy][N(CF<sub>3</sub>SO<sub>2</sub>)<sub>2</sub>] **5** / acetonitrile mixtures

| Mole Fraction [Bmpy][N(CF <sub>3</sub> SO <sub>2</sub> ) <sub>2</sub> ] <b>5</b> in acetonitrile | $\Delta H^\ddagger$ / kJ mol <sup>-1</sup> | $\Delta S^\ddagger$ / J K <sup>-1</sup> mol <sup>-1</sup> |
|--------------------------------------------------------------------------------------------------|--------------------------------------------|-----------------------------------------------------------|
| 0                                                                                                | 27.2 (2.5)                                 | -272.1 (8.6)                                              |
| 0.24                                                                                             | 37.3 (0.6)                                 | -218.7 (2.4)                                              |
| 0.94                                                                                             | 45.3 (1.7)                                 | -180.2 (6.2)                                              |

Eyring Data: [Bm<sub>2</sub>im][N(CF<sub>3</sub>SO<sub>2</sub>)<sub>2</sub>] **6** in acetonitrile

| Mole Fraction of <b>6</b> | Temperature / °C | [Nu] / mol L <sup>-1</sup> | <i>k</i> <sub>obs</sub> / 10 <sup>-3</sup> s <sup>-1</sup> | <i>k</i> <sub>2</sub> / 10 <sup>-3</sup> L mol <sup>-1</sup> s <sup>-1</sup> |      |       |      |
|---------------------------|------------------|----------------------------|------------------------------------------------------------|------------------------------------------------------------------------------|------|-------|------|
| 0.20                      | 16.0             | 0.112                      | 0.592                                                      | 5.29                                                                         |      |       |      |
|                           |                  |                            | 0.612                                                      | 5.46                                                                         |      |       |      |
|                           |                  |                            | 0.578                                                      | 5.16                                                                         |      |       |      |
|                           | 8.1              |                            | 0.378                                                      | 3.38                                                                         |      |       |      |
|                           |                  |                            | 0.378                                                      | 3.37                                                                         |      |       |      |
|                           |                  |                            | 0.365                                                      | 3.26                                                                         |      |       |      |
|                           | -8.1             |                            | 0.143                                                      | 1.28                                                                         |      |       |      |
|                           |                  |                            | 0.139                                                      | 1.24                                                                         |      |       |      |
|                           |                  |                            | 0.136                                                      | 1.21                                                                         |      |       |      |
|                           | 0.0              |                            | 0.0                                                        | 0.219                                                                        | 1.95 |       |      |
|                           |                  |                            |                                                            | 0.212                                                                        | 1.90 |       |      |
|                           |                  |                            |                                                            | 0.222                                                                        | 1.98 |       |      |
|                           |                  |                            |                                                            | 0.95                                                                         | 8.1  | 1.045 | 6.64 |
|                           |                  |                            |                                                            |                                                                              |      | 1.062 | 6.76 |
| 1.145                     |                  | 7.28                       |                                                            |                                                                              |      |       |      |
| 1.1                       |                  | 0.755                      |                                                            |                                                                              | 4.80 |       |      |
|                           | 0.763            | 4.85                       |                                                            |                                                                              |      |       |      |
|                           | 0.798            | 5.08                       |                                                            |                                                                              |      |       |      |
| -5                        | -5               | 0.533                      | 3.39                                                       |                                                                              |      |       |      |
|                           |                  | 0.563                      | 3.58                                                       |                                                                              |      |       |      |
|                           |                  | 0.513                      | 3.26                                                       |                                                                              |      |       |      |
|                           |                  | 0.313                      | 1.99                                                       |                                                                              |      |       |      |
| -12.5                     | -12.5            | 0.312                      | 1.99                                                       |                                                                              |      |       |      |
|                           |                  | 0.315                      | 2.00                                                       |                                                                              |      |       |      |

Activation parameters: Benzaldehyde **1a** and hexan-1-amine **2** in [Bm<sub>2</sub>im][N(CF<sub>3</sub>SO<sub>2</sub>)<sub>2</sub>] **6** / acetonitrile mixtures

| Mole Fraction [bm <sub>2</sub> im][N(CF <sub>3</sub> SO <sub>2</sub> ) <sub>2</sub> ] <b>6</b> in acetonitrile | ΔH <sup>‡</sup> / kJ mol <sup>-1</sup> | ΔS <sup>‡</sup> / J K <sup>-1</sup> mol <sup>-1</sup> |
|----------------------------------------------------------------------------------------------------------------|----------------------------------------|-------------------------------------------------------|
| 0                                                                                                              | 27.2 (2.5)                             | -272.1 (8.6)                                          |
| 0.20                                                                                                           | 34.1 (0.8)                             | -234.9 (2.7)                                          |
| 0.95                                                                                                           | 32.3 (1.1)                             | -235.2 (4.1)                                          |

Eyring Data: [TOA][N(CF<sub>3</sub>SO<sub>2</sub>)<sub>2</sub>] **8**

| Mole Fraction of # | Temperature / °C | [Nu] / mol L <sup>-1</sup> | <i>k</i> <sub>obs</sub> / 10 <sup>-3</sup> s <sup>-1</sup> | <i>k</i> <sub>2</sub> / 10 <sup>-3</sup> L mol <sup>-1</sup> s <sup>-1</sup> |
|--------------------|------------------|----------------------------|------------------------------------------------------------|------------------------------------------------------------------------------|
| 0.87               | 36.1             | 0.200                      | 0.938                                                      | 4.70                                                                         |
|                    |                  |                            | 1.113                                                      | 5.57                                                                         |
|                    |                  |                            | 1.195                                                      | 5.99                                                                         |
|                    | 41.7             |                            | 1.233                                                      | 6.18                                                                         |
|                    |                  |                            | 1.558                                                      | 7.81                                                                         |
|                    |                  |                            | 1.570                                                      | 7.87                                                                         |
|                    | 47.4             |                            | 1.742                                                      | 8.73                                                                         |
|                    |                  |                            | 2.049                                                      | 10.26                                                                        |
|                    |                  |                            | 1.776                                                      | 8.90                                                                         |
|                    | 53.8             |                            | 2.377                                                      | 11.91                                                                        |
|                    |                  |                            | 2.432                                                      | 12.18                                                                        |
|                    |                  |                            | 2.110                                                      | 10.57                                                                        |

Activation parameters: Benzaldehyde and hexan-1-amine **2** in [TOA][N(CF<sub>3</sub>SO<sub>2</sub>)<sub>2</sub>] **8**

| Mole Fraction [TOA][N(CF <sub>3</sub> SO <sub>2</sub> ) <sub>2</sub> ] <b>8</b> | Δ <i>H</i> <sup>‡</sup> / kJ mol <sup>-1</sup> | Δ <i>S</i> <sup>‡</sup> / J K <sup>-1</sup> mol <sup>-1</sup> |
|---------------------------------------------------------------------------------|------------------------------------------------|---------------------------------------------------------------|
| 0                                                                               | 27.2 (2.5)                                     | -272.1 (8.6)                                                  |
| 0.87                                                                            | 30.8 (3.7)                                     | -254.1 (11.8)                                                 |

Activation Parameter Summary:

| Solvent                                                                          | Mole Fraction | Δ <i>H</i> <sup>‡</sup> / kJ mol <sup>-1</sup> | Δ <i>S</i> <sup>‡</sup> / J K <sup>-1</sup> mol <sup>-1</sup> |
|----------------------------------------------------------------------------------|---------------|------------------------------------------------|---------------------------------------------------------------|
| Acetonitrile                                                                     | -             | 27.2 (2.5)                                     | -272.1 (8.6)                                                  |
| [TOA][N(CF <sub>3</sub> SO <sub>2</sub> ) <sub>2</sub> ] <b>8</b>                | 0.87          | 30.8 (3.7)                                     | -254.1 (11.8)                                                 |
| [Bm <sub>2</sub> im][N(CF <sub>3</sub> SO <sub>2</sub> ) <sub>2</sub> ] <b>6</b> | 0.20          | 34.1 (0.8)                                     | -234.9 (2.7)                                                  |
|                                                                                  | 0.95          | 32.3 (1.1)                                     | -235.2 (4.1)                                                  |
| [Bmim][N(CF <sub>3</sub> SO <sub>2</sub> ) <sub>2</sub> ] <b>4</b>               | 0.23          | 34.5 (0.5)                                     | -233.2 (1.7)                                                  |
|                                                                                  | 0.50          | 32.4 (0.8)                                     | -237.0 (2.8)                                                  |
|                                                                                  | 0.97          | 32.4 (1.3)                                     | -235.2 (4.6)                                                  |
| [Bmpy][N(CF <sub>3</sub> SO <sub>2</sub> ) <sub>2</sub> ] <b>5</b>               | 0.24          | 37.3 (0.6)                                     | -218.7 (2.4)                                                  |
|                                                                                  | 0.94          | 45.3 (1.7)                                     | -180.2 (6.2)                                                  |

## 4-Methoxybenzaldehyde **1b** and hexan-1-amine **2**

### Eyring Data: Acetonitrile

| Temperature / °C | [Nu] / mol L <sup>-1</sup> | $k_{\text{obs}}$<br>/ 10 <sup>-3</sup> s <sup>-1</sup> | $k_2$<br>/ 10 <sup>-3</sup> L mol <sup>-1</sup> s <sup>-1</sup> |
|------------------|----------------------------|--------------------------------------------------------|-----------------------------------------------------------------|
| 8.1              | 0.196                      | 0.0303                                                 | 0.154                                                           |
|                  |                            | 0.0232                                                 | 0.118                                                           |
| 63.6             | 0.153                      | 0.0185                                                 | 0.121                                                           |
|                  |                            | 0.0708                                                 | 0.463                                                           |
|                  |                            | 0.0744                                                 | 0.486                                                           |
|                  |                            | 0.0831                                                 | 0.543                                                           |
| 47.8             |                            | 0.0574                                                 | 0.375                                                           |
|                  |                            | 0.0493                                                 | 0.322                                                           |
|                  |                            | 0.0552                                                 | 0.361                                                           |
| 36.6             |                            | 0.0349                                                 | 0.228                                                           |
|                  |                            | 0.0461                                                 | 0.301                                                           |
|                  |                            | 0.0388                                                 | 0.254                                                           |
| 54.0             |                            | 0.0644                                                 | 0.421                                                           |
|                  |                            | 0.0672                                                 | 0.439                                                           |
|                  |                            | 0.0621                                                 | 0.406                                                           |

### Eyring Data: [Bmim][N(CF<sub>3</sub>SO<sub>2</sub>)<sub>2</sub>] **4**

| Mole Fraction<br>of <b>4</b> | Temperature /<br>°C | [Nu] / mol L <sup>-1</sup> | $k_{\text{obs}}$<br>/ 10 <sup>-3</sup> s <sup>-1</sup> | $k_2$<br>/ 10 <sup>-3</sup> L mol <sup>-1</sup> s <sup>-1</sup> |
|------------------------------|---------------------|----------------------------|--------------------------------------------------------|-----------------------------------------------------------------|
| 0.93                         | 29.4                | 0.237                      | 0.578                                                  | 2.44                                                            |
|                              |                     |                            | 0.543                                                  | 2.29                                                            |
|                              |                     |                            | 0.536                                                  | 2.26                                                            |
|                              | 36.6                |                            | 0.930                                                  | 3.93                                                            |
|                              |                     |                            | 0.932                                                  | 3.94                                                            |
|                              |                     |                            | 0.858                                                  | 3.62                                                            |
|                              | 44.3                |                            | 1.131                                                  | 4.78                                                            |
|                              |                     |                            | 1.275                                                  | 5.39                                                            |
|                              |                     |                            | 1.264                                                  | 5.34                                                            |
| 19.3                         | 0.333               | 1.41                       |                                                        |                                                                 |
|                              | 0.316               | 1.33                       |                                                        |                                                                 |
|                              | 0.329               | 1.39                       |                                                        |                                                                 |

Eyring Data: [Bmpy][N(CF<sub>3</sub>SO<sub>2</sub>)<sub>2</sub>] **5**

| Mole Fraction<br>of 5 | Temperature /<br>°C | [Nu] / mol L <sup>-1</sup> | <i>k</i> <sub>obs</sub><br>/ 10 <sup>-3</sup> s <sup>-1</sup> | <i>k</i> <sub>2</sub><br>/ 10 <sup>-3</sup> L mol <sup>-1</sup> s <sup>-1</sup> |
|-----------------------|---------------------|----------------------------|---------------------------------------------------------------|---------------------------------------------------------------------------------|
| 0.93                  | 22.3                | 0.227                      | 0.798                                                         | 3.51                                                                            |
|                       |                     |                            | 0.823                                                         | 3.62                                                                            |
|                       |                     |                            | 0.776                                                         | 3.41                                                                            |
|                       | 29.4                |                            | 1.144                                                         | 5.03                                                                            |
|                       |                     |                            | 1.133                                                         | 4.98                                                                            |
|                       |                     |                            | 1.389                                                         | 6.11                                                                            |
|                       | 14.5                |                            | 0.450                                                         | 1.98                                                                            |
|                       |                     |                            | 0.511                                                         | 2.25                                                                            |
|                       |                     |                            | 0.471                                                         | 2.07                                                                            |
|                       | 36.6                |                            | 1.895                                                         | 8.33                                                                            |
|                       |                     |                            | 2.033                                                         | 8.94                                                                            |

Eyring Data: [Bm<sub>2</sub>im][N(CF<sub>3</sub>SO<sub>2</sub>)<sub>2</sub>] **6**

| Mole Fraction<br>of 6 | Temperature /<br>°C | [Nu] / mol L <sup>-1</sup> | <i>k</i> <sub>obs</sub><br>/ 10 <sup>-3</sup> s <sup>-1</sup> | <i>k</i> <sub>2</sub><br>/ 10 <sup>-3</sup> L mol <sup>-1</sup> s <sup>-1</sup> |
|-----------------------|---------------------|----------------------------|---------------------------------------------------------------|---------------------------------------------------------------------------------|
| 0.95                  | 36.6                | 0.147                      | 0.958                                                         | 6.52                                                                            |
|                       |                     |                            | 1.062                                                         | 7.22                                                                            |
|                       |                     |                            | 1.010                                                         | 6.87                                                                            |
|                       | 48.1                |                            | 1.934                                                         | 13.16                                                                           |
|                       |                     |                            | 1.832                                                         | 12.46                                                                           |
|                       |                     |                            | 1.921                                                         | 13.07                                                                           |
|                       | 17.7                |                            | 0.476                                                         | 3.24                                                                            |
|                       |                     |                            | 0.442                                                         | 3.01                                                                            |
|                       |                     |                            | 0.446                                                         | 3.04                                                                            |
|                       | 63.6                |                            | 4.146                                                         | 28.21                                                                           |
|                       |                     |                            | 4.191                                                         | 28.52                                                                           |
|                       |                     |                            | 3.592                                                         | 24.45                                                                           |

Eyring Data: [Bm<sub>4</sub>im][N(CF<sub>3</sub>SO<sub>2</sub>)<sub>2</sub>] **7**

| Mole Fraction<br>of 7 | Temperature /<br>°C | [Nu] / mol L <sup>-1</sup> | <i>k</i> <sub>obs</sub><br>/ 10 <sup>-3</sup> s <sup>-1</sup> | <i>k</i> <sub>2</sub><br>/ 10 <sup>-3</sup> L mol <sup>-1</sup> s <sup>-1</sup> |
|-----------------------|---------------------|----------------------------|---------------------------------------------------------------|---------------------------------------------------------------------------------|
| 0.94                  | 36.6                | 0.171                      | 5.707                                                         | 33.38                                                                           |
|                       |                     |                            | 5.561                                                         | 32.52                                                                           |
|                       |                     |                            | 5.595                                                         | 32.72                                                                           |
|                       | 41.6                |                            | 7.248                                                         | 42.40                                                                           |
|                       |                     |                            | 6.519                                                         | 38.13                                                                           |
|                       |                     |                            | 6.536                                                         | 38.23                                                                           |
|                       | 25.9                |                            | 3.477                                                         | 20.33                                                                           |
|                       |                     |                            | 3.541                                                         | 20.71                                                                           |
|                       |                     |                            | 3.426                                                         | 20.04                                                                           |
|                       |                     |                            | 3.426                                                         | 20.04                                                                           |
|                       | 30.5                |                            | 4.241                                                         | 24.80                                                                           |
|                       |                     |                            | 4.194                                                         | 24.53                                                                           |
|                       |                     |                            | 3.969                                                         | 23.22                                                                           |

Eyring Data: [TOA][N(CF<sub>3</sub>SO<sub>2</sub>)<sub>2</sub>] **8**

| Mole Fraction<br>of 8 | Temperature /<br>°C | [Nu] / mol L <sup>-1</sup> | <i>k</i> <sub>obs</sub><br>/ 10 <sup>-3</sup> s <sup>-1</sup> | <i>k</i> <sub>2</sub><br>/ 10 <sup>-3</sup> L mol <sup>-1</sup> s <sup>-1</sup> |
|-----------------------|---------------------|----------------------------|---------------------------------------------------------------|---------------------------------------------------------------------------------|
| 0.87                  | 54.0                | 0.165                      | 0.349                                                         | 2.12                                                                            |
|                       |                     |                            | 0.476                                                         | 2.70                                                                            |
|                       | 63.6                |                            | 0.394                                                         | 2.29                                                                            |
|                       |                     |                            | 0.524                                                         | 3.05                                                                            |
|                       |                     |                            | 0.578                                                         | 3.36                                                                            |
|                       |                     |                            | 0.532                                                         | 3.10                                                                            |
|                       | 47.8                |                            | 0.388                                                         | 2.21                                                                            |
|                       |                     |                            | 0.448                                                         | 2.60                                                                            |
|                       |                     |                            | 0.433                                                         | 2.52                                                                            |
|                       |                     |                            | 0.433                                                         | 2.52                                                                            |
|                       | 36.6                |                            | 0.235                                                         | 1.37                                                                            |
|                       |                     |                            | 0.263                                                         | 1.53                                                                            |
|                       |                     |                            | 0.323                                                         | 1.88                                                                            |



Activation Parameter Summary:

| Solvent                                                                          | Mole Fraction | $\Delta H^\ddagger / \text{kJ mol}^{-1}$ | $\Delta S^\ddagger / \text{J K}^{-1} \text{mol}^{-1}$ |
|----------------------------------------------------------------------------------|---------------|------------------------------------------|-------------------------------------------------------|
| Acetonitrile                                                                     | -             | 14.2 (1.0)                               | -333.1 (3.3)                                          |
| [TOA][N(CF <sub>3</sub> SO <sub>2</sub> ) <sub>2</sub> ] <b>8</b>                | 0.87          | 15.8 (3.2)                               | -312.9 (10.0)                                         |
| [Bm <sub>4</sub> im][N(CF <sub>3</sub> SO <sub>2</sub> ) <sub>2</sub> ] <b>7</b> | 0.94          | 28.8 (1.4)                               | -246.1 (4.6)                                          |
| [Bm <sub>2</sub> im][N(CF <sub>3</sub> SO <sub>2</sub> ) <sub>2</sub> ] <b>6</b> | 0.95          | 33.3 (1.3)                               | -243.4 (4.0)                                          |
| [Bmim][N(CF <sub>3</sub> SO <sub>2</sub> ) <sub>2</sub> ] <b>4</b>               | 0.93          | 36.8 (1.5)                               | -238.5 (5.0)                                          |
| [Bmpy][N(CF <sub>3</sub> SO <sub>2</sub> ) <sub>2</sub> ] <b>5</b>               | 0.93          | 41.9 (1.9)                               | -214.8 (6.5)                                          |
